# Supplementary material for: Nuclear and magnetic structures and magnetic properties of synthetic brochantite, Cu4(OH)6SO4
Source: Royal Society of Chemistry journal article supplement (doi:10.1039/b510545e), 2005-12-06
Supplement: b510545e.pdf [file b510545e.pdf]

## Supplementary Information

# Nuclear and Magnetic Structures and Magnetic Properties of Synthetic Brochantite, $\text{Cu}_4(\text{OH})_6\text{SO}_4$

Serge Vilminot,<sup>\* a</sup> Mireille Richard-Plouet,<sup>† a</sup> Gilles André,<sup>b</sup> Dariusz Swierczynski,<sup>a</sup> Françoise Bourée-Vigneron,<sup>b</sup> and Mohamedally Kurmoo<sup>c</sup>

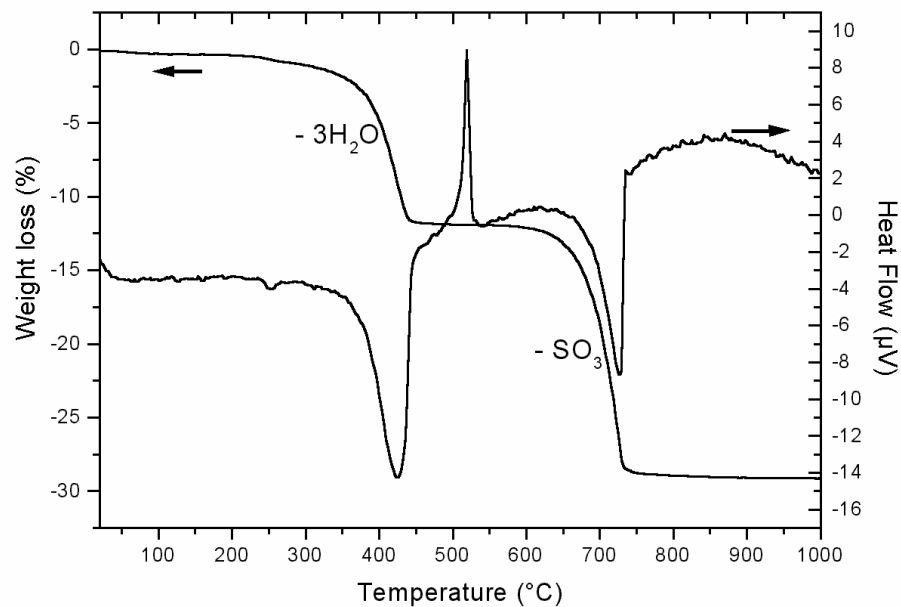

Figure S1: TG-DTA traces recorded under air at a 3.5°C/min heating rate

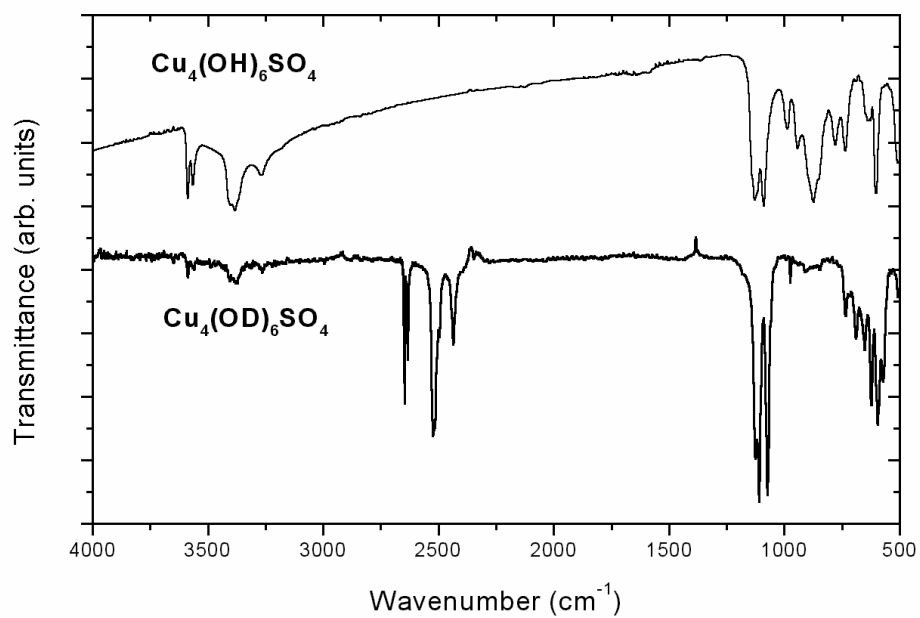

Figure S2: Infrared spectra of a)  $\text{Cu}_4(\text{OH})_6\text{SO}_4$  and b)  $\text{Cu}_4(\text{OD})_6\text{SO}_4$

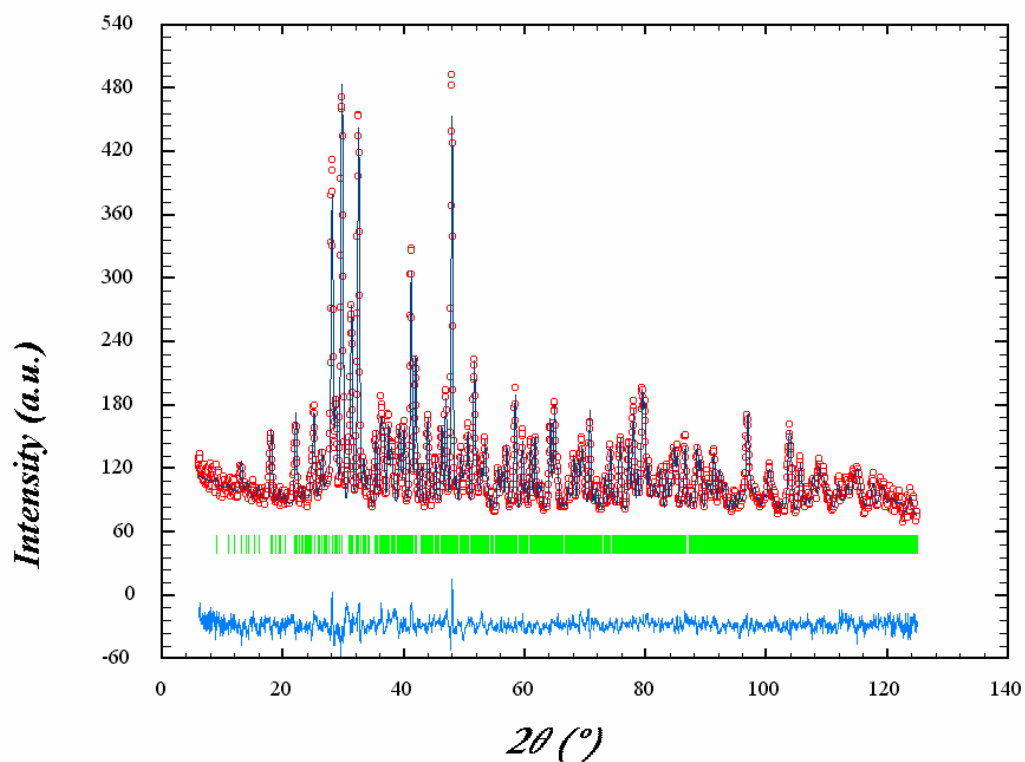

Figure S3. Observed (O) and calculated (—) profiles of the powder neutron pattern of  $\text{Cu}_4(\text{OH})_6\text{SO}_4$  obtained on the 3T2 diffractometer at 300 K with position of the Bragg reflections (short vertical lines) and difference between observed and calculated profiles.

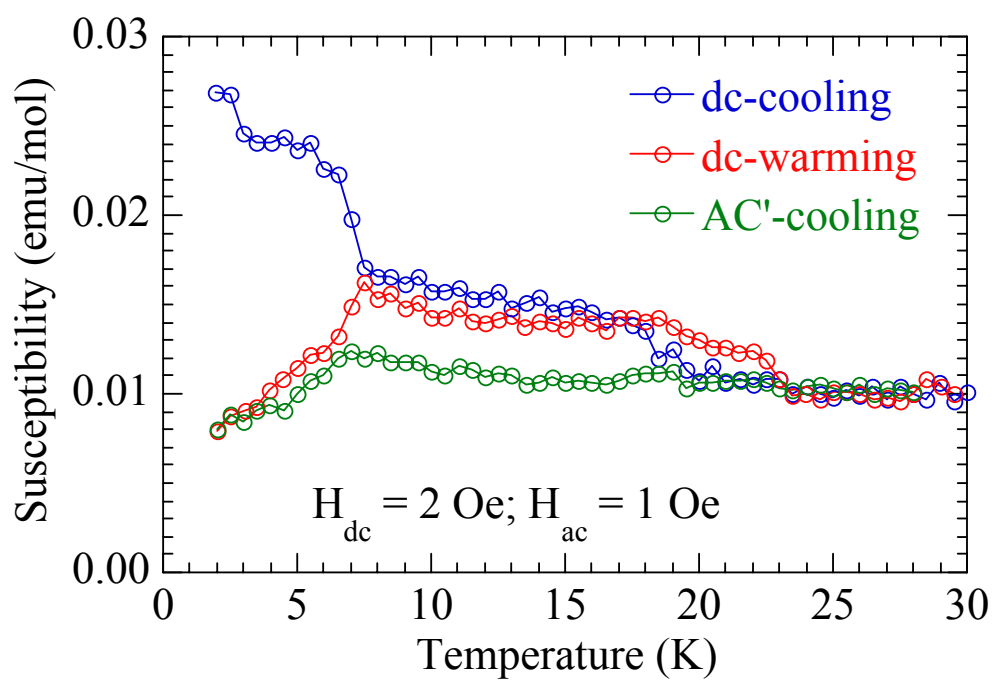

Figure S4. ac- and dc-susceptibilities measured in low applied fields ( $H_{ac} = 1 \text{ Oe}$  (17 Hz),  $H_{dc} = 2 \text{ Oe}$ ).

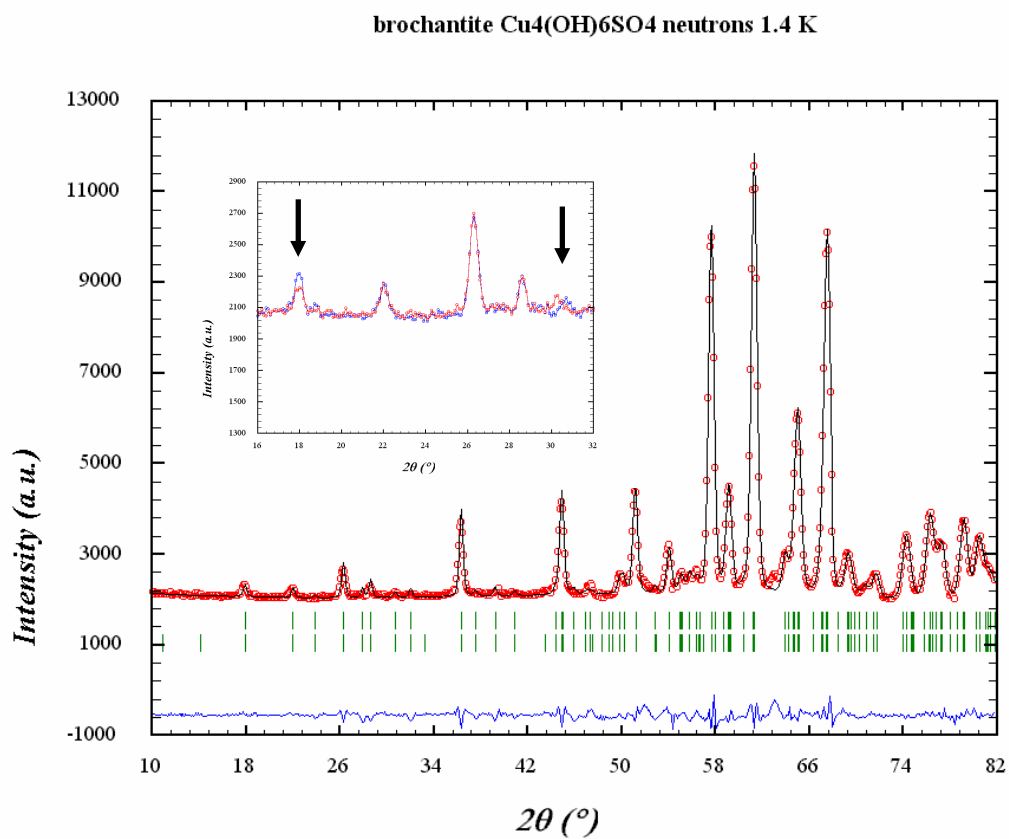

Figure S5. Observed (○) and calculated (—) profiles of the neutron pattern of  $\text{Cu}_4(\text{OH})_6\text{SO}_4$  obtained on the G4.1 diffractometer at 1.4 K with position of the Bragg reflections (short vertical lines, nuclear, magnetic) and difference between observed and calculated profiles. Inset : Zoom in the  $16$  to  $32^\circ$  region for the 1.4 K (blue) and 12 K (red) data, the arrows evidencing the magnetic contributions at  $18$  and  $30.7^\circ$ .

Table S1. Fractional atomic positions and isothermal temperature factors from neutron powder diffraction data at 300 K for deuterated brochantite.

| Atom | x/a        | y/b        | z/c        | B (Å <sup>2</sup> ) | Occupancy |
|------|------------|------------|------------|---------------------|-----------|
| Cu1  | 0.2942(7)  | 0.4889(8)  | 0.5297(17) | 0.84(13)            | 4.0       |
| Cu2  | 0.2940(8)  | 0.4938(10) | 1.0210(21) | 0.82(15)            | 4.0       |
| Cu3  | 0.1168(6)  | 0.2558(10) | 0.1788(17) | 0.91(13)            | 4.0       |
| Cu4  | 0.1192(7)  | 0.2579(10) | 0.6867(20) | 0.83(13)            | 4.0       |
| S    | 0.3936(12) | 0.1824(13) | 0.3330(44) | 0.90(24)            | 4.0       |
| OH1  | 0.0970(10) | 0.1333(12) | 0.4297(26) | 0.86(20)            | 4.0       |
| OH2  | 0.0867(9)  | 0.1299(12) | 0.9189(25) | 0.99(18)            | 4.0       |
| OH3  | 0.1582(11) | 0.3826(13) | 0.4571(27) | 1.14(23)            | 4.0       |
| OH4  | 0.1590(9)  | 0.3871(11) | 0.9385(21) | 1.23(20)            | 4.0       |
| OH5  | 0.2488(8)  | 0.5940(10) | 0.2538(31) | 1.52(16)            | 4.0       |
| OH6  | 0.3625(7)  | 0.3932(10) | 0.8139(28) | 1.33(15)            | 4.0       |
| O1   | 0.2870(11) | 0.1459(11) | 0.2700(41) | 2.87(22)            | 4.0       |
| O2   | 0.3809(8)  | 0.3433(9)  | 0.3158(31) | 2.08(17)            | 4.0       |
| O3   | 0.4446(13) | 0.1452(17) | 0.0807(33) | 3.11(30)            | 4.0       |
| O4   | 0.4441(11) | 0.1549(14) | 0.5431(19) | 2.43(17)            | 4.0       |
| D1   | 0.0226(12) | 0.1056(15) | 0.3840(34) | 2.51(24)            | 4.0       |
| D2   | 0.0137(9)  | 0.1096(12) | 0.8902(23) | 1.24(18)            | 4.0       |
| H3   | 0.1060(11) | 0.4581(12) | 0.4277(29) | 1.39(21)            | 0.17(8)   |
| D3   | 0.1060(11) | 0.4581(12) | 0.4277(29) | 1.39(21)            | 3.83(8)   |
| H4   | 0.1066(14) | 0.4468(14) | 0.9118(31) | 2.11(27)            | 0.26(8)   |
| D4   | 0.1066(14) | 0.4468(14) | 0.9118(31) | 2.11(27)            | 3.74(8)   |
| D5   | 0.1714(8)  | 0.5995(10) | 0.2232(30) | 2.25(16)            | 4.0       |
| H6   | 0.3443(9)  | 0.3068(11) | 0.8081(31) | 1.57(19)            | 0.46(5)   |
| D6   | 0.3443(9)  | 0.3068(11) | 0.8081(31) | 1.57(19)            | 3.54(5)   |

D/(H+D) = 0.96

Table S2. Interatomic distances (Å) and angles (°) for deuteriated brochantite from neutron data at 300 K.

|         |         |             |           |             |           |
|---------|---------|-------------|-----------|-------------|-----------|
| Cu1-OH1 | 1.99(2) | OH1-Cu1-OH3 | 165(6)    | OH3-Cu1-O2  | 94.5(10)  |
| Cu1-OH3 | 2.03(2) | OH1-Cu1-OH5 | 78.0(10)  | OH5-Cu1-OH6 | 171(10)   |
| Cu1-OH5 | 1.93(2) | OH1-Cu1-OH6 | 93.8(10)  | OH5-Cu1-O1  | 90.2(13)  |
| Cu1-OH6 | 1.98(2) | OH1-Cu1-O1  | 82.2(9)   | OH5-Cu1-O2  | 87.0(8)   |
| Cu1-O1  | 2.36(2) | OH1-Cu1-O2  | 94.5(9)   | OH6-Cu1-O1  | 92.1(10)  |
| Cu1-O2  | 2.39(2) | OH3-Cu1-OH5 | 90.6(11)  | OH6-Cu1-O2  | 90.3(11)  |
| <Cu1-O> | 2.11    | OH3-Cu1-OH6 | 98.0(12)  | O1-Cu1-O2   | 176(10)   |
|         |         | OH3-Cu1-O1  | 88.3(10)  |             |           |
| Cu2-OH2 | 2.03(2) | OH2-Cu2-OH4 | 170(9)    | OH4-Cu2-O2  | 95.7(10)  |
| Cu2-OH4 | 2.02(2) | OH2-Cu2-OH5 | 83.5(9)   | OH5-Cu2-OH6 | 171(10)   |
| Cu2-OH5 | 1.92(2) | OH2-Cu2-OH6 | 90.0(10)  | OH5-Cu2-O1  | 93.2(14)  |
| Cu2-OH6 | 1.97(2) | OH2-Cu2-O1  | 84.8(11)  | OH5-Cu2-O2  | 87.2(9)   |
| Cu2-O1  | 2.36(2) | OH2-Cu2-O2  | 93.6(9)   | OH6-Cu2-O1  | 92.4(10)  |
| Cu2-O2  | 2.39(2) | OH4-Cu2-OH5 | 92.6(11)  | OH6-Cu2-O2  | 87.1(11)  |
| <Cu2-O> | 2.12    | OH4-Cu2-OH6 | 94.8(10)  | O1-Cu2-O2   | 178(10)   |
|         |         | OH4-Cu2-O1  | 86.0(10)  |             |           |
| Cu3-OH1 | 2.00(2) | OH1-Cu3-OH2 | 100.6(13) | OH2-Cu3-O3  | 93.2(11)  |
| Cu3-OH2 | 1.97(2) | OH1-Cu3-OH3 | 78.9(7)   | OH3-Cu3-OH4 | 97.2(11)  |
| Cu3-OH3 | 2.06(2) | OH1-Cu3-OH4 | 172(10)   | OH3-Cu3-O1  | 91.8(10)  |
| Cu3-OH4 | 2.11(2) | OH1-Cu3-O1  | 80.4(9)   | OH3-Cu3-O3  | 90.5(11)  |
| Cu3-O1  | 2.43(2) | OH1-Cu3-O3  | 98.7(12)  | OH4-Cu3-O1  | 93.2(10)  |
| Cu3-O3  | 2.41(2) | OH2-Cu3-OH3 | 176(10)   | OH4-Cu3-O3  | 87.9(10)  |
| <Cu3-O> | 2.16    | OH2-Cu3-OH4 | 82.9(8)   | O1-Cu3-O3   | 177(10)   |
|         |         | OH2-Cu3-O1  | 84.4(10)  |             |           |
| Cu4-OH1 | 1.95(2) | OH1-Cu4-OH2 | 98.2(12)  | OH2-Cu4-O4  | 97.8(10)  |
| Cu4-OH2 | 2.00(2) | OH1-Cu4-OH3 | 81.5(9)   | OH3-Cu4-OH4 | 94.1(11)  |
| Cu4-OH3 | 2.00(2) | OH1-Cu4-OH4 | 173(10)   | OH3-Cu4-OH5 | 103.4(11) |
| Cu4-OH4 | 1.96(2) | OH1-Cu4-OH5 | 69.8(8)   | OH3-Cu4-O4  | 84.7(10)  |
| Cu4-OH5 | 2.33(1) | OH1-Cu4-O4  | 89.1(10)  | OH4-Cu4-OH5 | 106.0(11) |
| Cu4-O4  | 2.42(2) | OH2-Cu4-OH3 | 177(10)   | OH4-Cu4-O4  | 96.1(10)  |
| <Cu4-O> | 2.11    | OH2-Cu4-OH4 | 85.9(9)   | OH5-Cu4-O4  | 156(3)    |
|         |         | OH2-Cu4-OH5 | 74.2(7)   |             |           |
| Cu1-Cu2 | 2.96(2) | Cu3-Cu4     | 2.97(2)   | Cu1-Cu2-Cu1 | 178(10)   |
| Cu1-Cu2 | 3.07(2) | Cu3-Cu4     | 3.06(2)   | Cu3-Cu4-Cu3 | 179(10)   |

Table S3. Atomic positions from neutron powder data at 1.4 K for deuteriated brochantite.

| Atom | x/a      | y/b      | z/c       | Mx ( $\mu_B$ ) | Occupancy |
|------|----------|----------|-----------|----------------|-----------|
| Cu1  | 0.289(1) | 0.488(2) | 0.522(4)  | 0.22(11)       | 4.0       |
| Cu2  | 0.303(1) | 0.495(1) | 1.037(3)  | 0.22(11)       | 4.0       |
| Cu3  | 0.126(1) | 0.264(1) | 0.186(4)  | 0.74(7)        | 4.0       |
| Cu4  | 0.118(1) | 0.253(2) | 0.661(3)  | 0.74(7)        | 4.0       |
| S    | 0.386(4) | 0.184(4) | 0.313(13) |                | 4.0       |
| OH1  | 0.099(2) | 0.123(3) | 0.409(5)  |                | 4.0       |
| OH2  | 0.090(2) | 0.119(3) | 0.898(5)  |                | 4.0       |
| OH3  | 0.178(2) | 0.399(3) | 0.471(5)  |                | 4.0       |
| OH4  | 0.177(2) | 0.383(3) | 0.991(5)  |                | 4.0       |
| OH5  | 0.246(2) | 0.602(2) | 0.234(4)  |                | 4.0       |
| OH6  | 0.384(1) | 0.396(2) | 0.804(5)  |                | 4.0       |
| O1   | 0.279(2) | 0.134(2) | 0.261(5)  |                | 4.0       |
| O2   | 0.371(1) | 0.343(2) | 0.304(5)  |                | 4.0       |
| O3   | 0.460(2) | 0.146(2) | 0.166(3)  |                | 4.0       |
| O4   | 0.440(2) | 0.153(2) | 0.573(5)  |                | 4.0       |
| H1   | 0.007(2) | 0.095(2) | 0.386(5)  |                | 0.05(8)   |
| D1   | 0.007(2) | 0.095(2) | 0.386(5)  |                | 3.95(8)   |
| D2   | 0.006(2) | 0.136(2) | 0.895(4)  |                | 4.0       |
| D3   | 0.097(2) | 0.454(3) | 0.463(5)  |                | 4.0       |
| H4   | 0.111(1) | 0.442(3) | 0.923(6)  |                | 0.17(8)   |
| D4   | 0.111(1) | 0.442(3) | 0.923(6)  |                | 3.83(8)   |
| D5   | 0.132(1) | 0.603(1) | 0.178(5)  |                | 4.0       |
| H6   | 0.325(1) | 0.296(2) | 0.754(5)  |                | 0.30(6)   |
| D6   | 0.325(1) | 0.296(2) | 0.754(7)  |                | 3.70(6)   |



Table S4. Atomic positions and magnetic moment of the copper atoms within the cell at 1.4K.

| Atom | x/a      | y/b      | z/c      | $M_x$ ( $\mu_B$ ) |
|------|----------|----------|----------|-------------------|
| Cu11 | 0.289(1) | 0.488(2) | 0.522(4) | 0.22(11)          |
| Cu12 | 0.711    | 0.512    | 0.478    | -0.22(11)         |
| Cu13 | 0.211    | 0.988    | 0.478    | 0.22(11)          |
| Cu14 | 0.789    | 0.012    | 0.522    | -0.22(11)         |
| Cu21 | 0.303(1) | 0.495(1) | 1.037(3) | 0.22(11)          |
| Cu22 | 0.697    | 0.505    | -0.037   | -0.22(11)         |
| Cu23 | 0.197    | 0.995    | -0.037   | 0.22(11)          |
| Cu24 | 0.803    | 0.005    | 1.037    | -0.22(11)         |
| Cu31 | 0.126(1) | 0.264(1) | 0.186(4) | -0.74(7)          |
| Cu32 | 0.874    | 0.736    | 0.814    | 0.74(7)           |
| Cu33 | 0.374    | 0.764    | 0.814    | -0.74(7)          |
| Cu34 | 0.626    | 0.236    | 0.186    | 0.74(7)           |
| Cu41 | 0.118(1) | 0.253(2) | 0.661(3) | -0.74(7)          |
| Cu42 | 0.882    | 0.747    | 0.339    | 0.74(7)           |
| Cu43 | 0.382    | 0.753    | 0.339    | -0.74(7)          |
| Cu44 | 0.618    | 0.247    | 0.661    | 0.74(7)           |
